# Supplementary material for: Preclinical Establishment of a Divalent Vaccine against SARS-CoV-2
Source: MDPI journal article supplement (doi:10.3390/vaccines10040516), 2022-03-26
Supplement: s1 [file s1]

Supplementary information to the manuscript:

## **Preclinical establishment of a divalent vaccine against SARS-CoV-2**

**Zsofia Hevesi, Daniela Gerges, Sebastian Kapps, Raimundo Freire, Sophie Schmidt, Daniela D. Pollak, Klaus Schmetterer, Tobias Frey, Rita Lang, Wolfgang Winnicki, Alice Schmidt, Tibor Harkany, Ludwig Wagner**

This file contains:

- Supplementary Figures S1-S4

- Supplementary Tables S1-S2

- List of material and reagents used

## Supplementary Figure S1

‘VieVa’ coding (A) and translated sequence (B)

A. 100-300 (N) + 4x Gly + 300-685 (S)

ATGAAAGATCTCAGTCCGCGCTGGTACTTTTATTATTTGGGAACCGGCCAGAAAGCGGGCCTCCC  
ATATGGAGCCAATAAGGACGGGATTATATGGGTGGCTACAGAGGGAGCCCTCAATACGCCAAAA  
GATCACATCGGAACAAGAAACCCTGCTAATAATGCCGCAATCGTGCTGCAGTTGCCTCAGGGGAC  
GACGCTTCCTAAAGGCTTTTACGCAGAAGGATCACGCGGCGGCAGCCAAGCATCCTCAAGGTCTA  
GTTCCAGAAGTCGAAACAGCTCCAGAACTCCACACCAGGGTCCAGTAGGGGCACAAGTCCGGC  
GCGGATGGCGGGCAACGGCGGAGACGCCGCACTCGCTCTGTTGCTCCTGGACCGGCTCAACCAAC  
TTGAATCCAAGATGAGTGGTAAGGGACAGCAGCAACAAGGTCAAACCGTAACCAAGAAAAGCGC  
TGCAGAAGCTTCTAAAAAACCTCGACAAAAACGGACCGCTACGAAGGCATATAACGTTACTCAA  
GCCTTCGGGAGACGAGGGCCGGAGCAAACCCAGGGGAATTTTGGAGATCAGGAGCTCATCCGGC  
AAGGGACAGATTACAAACATG**GTGGCGAGGTT**GTACACTTAAAGTTTACGGTCGAAAAGGG  
AATCTACCAACATCAAATTTTAGGGTACAACCTACGGAATCTATCGTACGCTTCCCGAATATCAC  
TAACTTGTGTCCGTTTCGGCGAGGTTTTAATGCGACCAGGTTTGCTTCCGTGTACGCCTGGAACAG  
GAAACGGATCTCCAATTGTGTGCGCCGATTACTCCGTCTTGATAATTCAGCATCTTTCAGCACGTT  
TAAATGTTACGGAGTTTCCCCACAAAATTGAATGACCTTTGCTTTACGAACGTCTACGCGGATTC  
ATTTGTAATCCGGGGGGACGAAGTTAGGCAAATTGCGCCAGGGCAGACTGGCAAGATAGCTGAC  
TATAATTATAAATTGCCGGATGACTTTACGGGCTGTGTGATTGCTTGGAACCAAATAATCTGGAC  
TCAAAGGTAGGGGGAAATTATAACTACCTTTACAGGCTGTTCCGGAAGAGTAATCTGAAGCCATT  
CGAAAGAGATATAAGTACAGAGATCTACCAAGCTGGAAGCACCCCCTGCAATGGTGTGTAAGGA  
TTCAATTGTTATTTCCCATTCGAATCCTATGGTTTTCAACCGACGAATGGGGTGGGATACCAACCA  
TATCGAGTTGTGGTTCTCAGTTTCGAGTTGCTTCATGCTCCTGCGACAGTATGTGGACCAAAAAAA  
TCTACTAATCTGGTGAAGAATAAATGCGTCAATTTTAATTTTAATGGTCTGACAGGTACCGGAGTG  
CTTACGGAATCTAACAAGAAGTTTCTTCCTTTTCAACAGTTCGGGAGGGACATAGCCGACACAAC  
TGACGCGGTAAGAGATCCGCAGACGTTGGAATTTCTCGATATAACTCCATGCTCATTGAGGAG  
TGAGTGTTATCACTCCTGGTACGAACACCAGTAATCAGGTTGCAGTTCTTTATCAGGACGTGAATT  
GTACAGAGGTCCCGGTTGCGATACACGCGGACCAGCTGACGCCCACGTGGCGGGTTTACTCAACT  
GGGTCAAATGTGTTTCAAACCAGAGCCGGCTGCCTCATAGGAGCCGAGCATGTGAACAACAGTTA  
TGAATGTGACATACCTATCGGGGCGGGGATCTGCGCTTCATATCAAACGCAAACCAATTCCCCGC  
GAAGAGCGCGAT**GA**

B.

(his Tag)-

MKDLSRWYFYLLGTGPEAGLPYGANKDGIWVATEGALNTPKDHIGTRNPANNAIIVLQLPQGTTL  
PKGIFYAEGSRGGSQASSRSSRSRNSTPGSSRGTSARMAGNGGDAALALLLDRLNQLESKMS  
GKGQQQQGQTVTKKSAEASKKPRQKRTATKAYNVTQAFRRGPEQTQGNFGDQELIRQGTDYKHG  
GGGCTLKSFTVEKGIYQTSNFRVQPTESIVRFPNITNLCPFGEVFNATRFASVYAWNKRISNCVADYS  
VLYNSASFSTFKCYGVSPTKLNDLCFTNVYADSFVIRGDEVQRIPAGQTGKIADYNYKLPDDFTGCVIA  
WNSNNLDSKVGGNYNLYRLFRKSNLKPFRDISTEYIYQAGSTPCNGVEGFNCYFPLQSYGFQPTNGV  
GYQPYRVVLSFELLHAPATVCGPKKSTNLVKNKCVNFNENGLTGTGVLTESNKKFLPFQQFGRDIAD  
TTDAVRDPQTLEILDITPCSFGGVSVITPGTNTSNQVAVLYQDVNCTEVPVAIHADQLTPTWRVYSTGS  
NVFQTRAGCLIGAEHVNNSECDIPIGAGICASYQTQTNPRRAR\*

## Supplementary Figure S2

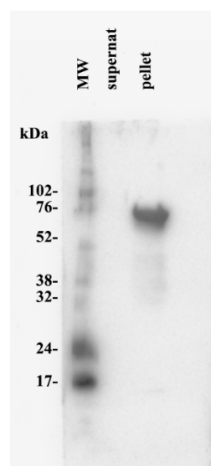

**Adsorption of recombinant 'VieVac' protein to Imject™ Alum and immunoblotting with convalescent serum.** Equal volumes of fusion protein solution and Imject™ Alum were incubated at room temperature for 5 min under constant rotation. An aliquot (20  $\mu$ l) was centrifuged at 12,000 g. Pre-cleared supernatant (lane 2) did not contain any 'VieVac' protein but all was adsorbed onto the pelleted particles of Imject™ Alum (lane 3). Molecular weight (MW) markers are in lane 1.

**Supplementary Figure S3**

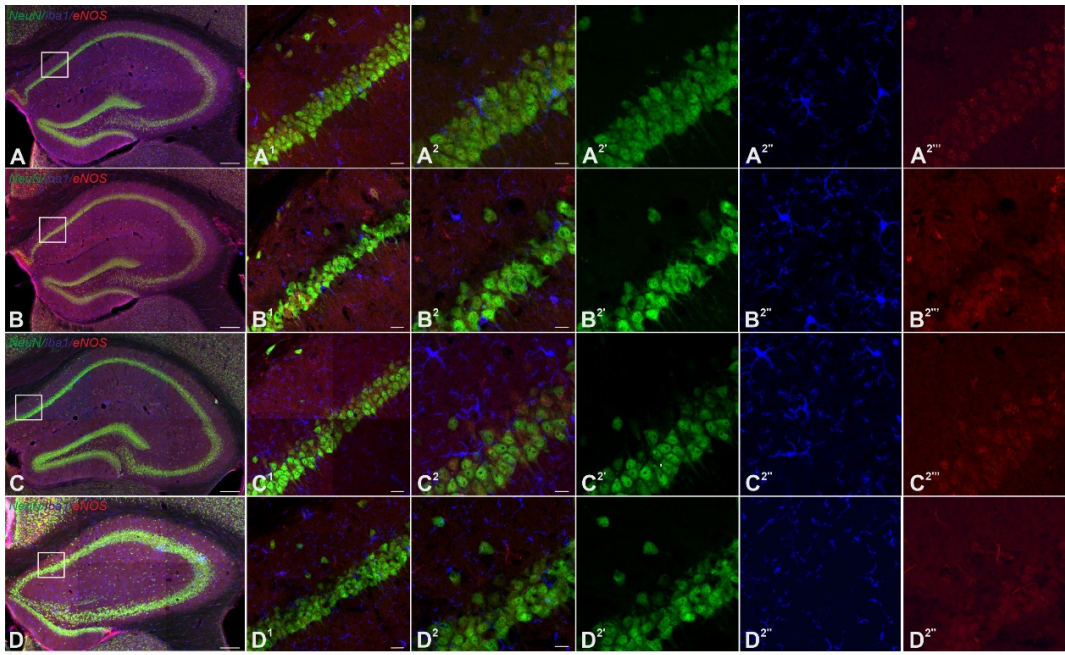

**Multiple immunofluorescence labelling confirmed the lack of adverse effects on the density and morphology of neurons and microglia in the hippocampus of immunized mouse brain.** NeuN (green, neurons, A2'-D2'), Iba1 (blue, microglia, A2''-D2'') and eNOS immunoreactivities (red, vasculature, A2'''-D2''') were assessed in control (A) and Addavax™/VieVac'-injected animals (B: 10 µg, C: 20 µg, D: 40 µg). *Scale bars* = 200 µm (A-D), 20 µm (A<sup>1</sup>-D<sup>1</sup>), 10 µm (A<sup>2</sup>-D<sup>2''</sup>).

## Supplementary Figure S4

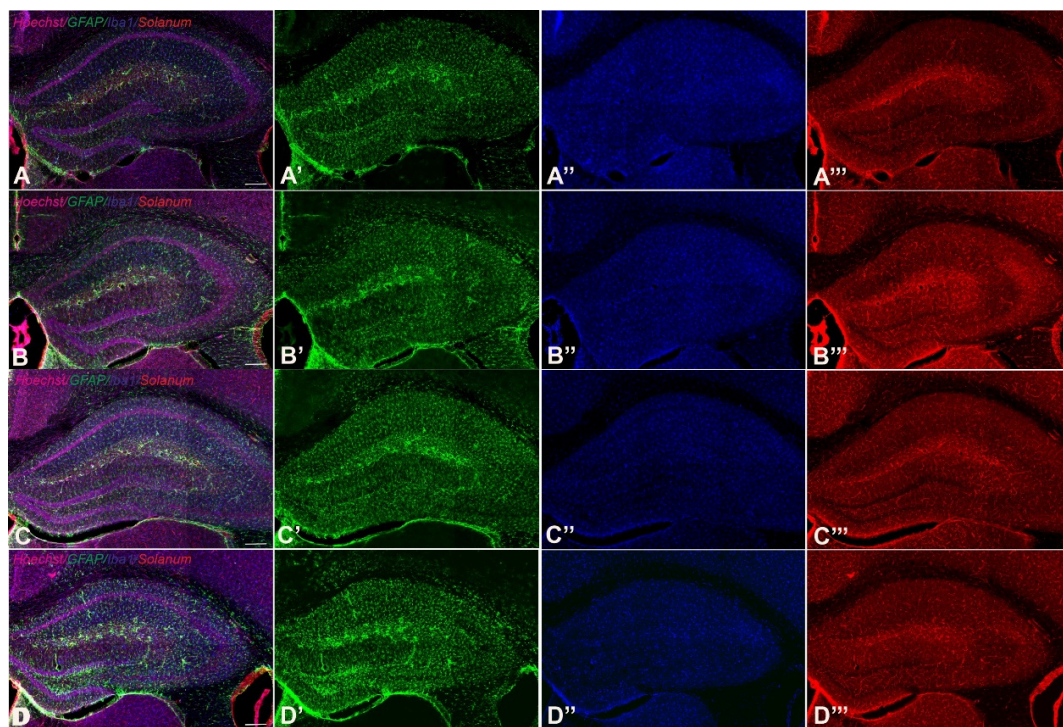

**Multiple immunofluorescence labelling confirms the lack of inflammation in immunized mouse brain.** GFAP (green, astroglia, A2'-D2'), Iba1 (blue, microglia, A2''-D2'') and eNOS immunoreactivities (red, vasculature, A2'''-D2''') were assessed in control (A) and Addavax<sup>TM</sup>/VieVac'-injected animals (B: 10 µg, C: 20 µg, D: 40 µg). *Scale bars* = 200 µm.

**Supplementary Table S1**

| <b>Marker</b>                                   | <b>Company</b>  | <b>Host</b> | <b>IH dilution</b> | <b>Catalogue no.</b> |
|-------------------------------------------------|-----------------|-------------|--------------------|----------------------|
| eNOS                                            | Invitrogen      | rabbit      | 1:300              | PA3-031A             |
| GFAP                                            | Synaptic System | guinea pig  | 1:1000             | 173004               |
| Iba1                                            | Abcam           | goat        | 1:500              | Ab5076               |
| NeuN                                            | EMD Millipore   | chicken     | 1:1000             | ABN91                |
| Solanum tuberosum                               | Vector          | -           | 10 µg/µl           | B-1165-2             |
| biotinylated lectin                             | Laboratories    |             |                    |                      |
| Hoechst 33,342                                  | Sigma           | -           | 1:10.000           | 23491-52-3           |
| His tag HIS.H8                                  | Millipore       | mouse       | 1:500              | 05-949               |
| anti-human IgG (H+L)<br>F(ab') <sub>2</sub> HRP | Millipore,      | goat        | 1:20.000           | AQ112P               |
| anti-mouse<br>immunoglobulin/HRP                | Dako            | goat        | 1:10.000           | P0447                |

Antibodies and their use for biochemistry and histochemistry.

## Supplementary Table S2

| Target Name | probe set, TaqMan | P value       |
|-------------|-------------------|---------------|
| VEGFA       | Mm01281447_m1     | 0,5953        |
| CD19        | Mm00515420_m1     | 0,7370        |
| CD3e        | Mm1179194_m1      | 0,7627        |
| CD8a        | Mm01182108_m1     | 0,6222        |
| Granzyme A  | Mm01304452_m1     | <b>0,3351</b> |
| TGFb1       | Mm03024053_m1     | 0,8565        |
| IFNg        | Mm01168134_m1     | 0,8044        |
| Perforin    | Mm00812512_m1     | 0,5776        |

**Gene expression in spleen measured by qPCR** in control (AddaVax adjuvant only,  $n = 4$ ) vs. immunized mice (Addavax<sup>TM</sup>/'VieVac',  $n = 13$ ) 28 days after the initial injection. No statistical difference in gene expression was found. A trend towards up-regulation in granzyme A was seen in the test group.

# **List of material and reagents used.**

|                                                            | <b>Company</b>       | <b>Identifier</b> |
|------------------------------------------------------------|----------------------|-------------------|
| <b>Experimental models</b>                                 |                      |                   |
| BL21 (DE3) Competent Cells                                 | Agilent Technologies | #230280           |
| One Shot™ TOP10 Chemically Competent E. coli               | Invitrogen           | #C404010          |
| High Five Insect cells (Hi5)                               | Invitrogen           | #B855-02          |
| Sf9 cells in Sf-900™ II SFM                                | Gibco                | #11496015         |
| pEntry/D-TOPO vector                                       | Invitrogen           | # CA92008         |
| One Shot TOP10 chemically competent E.coli                 | Invitrogen           | # CA92008         |
| PureLink™ Quick Plasmid Miniprep Kit                       | Invitrogen           | # K210010         |
| pDEST™ 10                                                  | Invitrogen           | #11806015         |
| LR-Clonase II enzyme                                       | Invitrogen           | #11791020         |
| Max Efficiency® DH10Bac™ competent E. coli                 | Invitrogen           | #10361012         |
| Cellfectin® II Reagent                                     | Invitrogen           | #10362-100        |
| Grace's Insect Medium Unsupplemented                       | Gibco                | #11595030         |
| SFM4Insect™ with L-Glutamine                               | Cytiva,              | # SH30912.01      |
| Alexa Fluor 594 goat anti-mouse                            | Invitrogen           | #A11032           |
| VECTASHIELD mounting medium for fluorescence               | Vector Laboratories  | #H-1000           |
| Terrific Broth                                             | Gibco                | #A13743-01        |
| Ni-NTA His-Bind Resin                                      | Novagen              | #70666;           |
| Mini-PROTEAN® TGX™                                         | BioRad               | # 456-1093        |
| MINI-Protean TGX 14-15%, IPG/prep-well comb, 7cm IPG strip | BioRad               | #456-1081         |
| Chemiluminescence Blocking Reagent                         | Roche                | #11500694001      |



|                                                  |                                                |              |
|--------------------------------------------------|------------------------------------------------|--------------|
| BM chemiluminescence substrate solutions A and B | Roche                                          | #11500694001 |
| BugBuster Protein Extraction Reagent             | Novagen                                        | #70584-3     |
| benzonase endonuclease                           | Novagen                                        | #70664-3     |
| Imject™ Alum                                     | Thermo Scientific                              | #77161       |
| Laemmli Sample Buffer                            | Bio-Rad                                        | #1610747     |
| 12% SDS PAGE                                     | Bio-Rad                                        | #4561045     |
| AddaVax™                                         | InvivoGen                                      | #vac-adx-10  |
| assay buffer                                     | Immunodiagnosics                               | #HS01        |
| MagMAX mirVana Total RNA isolation Kit           | applied biosystems by Thermo Fisher Scientific | #A27828      |
| TRIzol™ Reagent                                  | ThermoFisher Scientific                        | #15596026    |
| RevertAid RT Kit                                 | Thermo Fisher Scientific                       | #K1691       |
| TaqMan 2x universal PCR master mix               | applied biosystems by Thermo Fisher Scientific | #4304437     |
| RBC Lysis Buffer                                 | Biolegend                                      | # 420301     |
| Phytohemagglutinin (PHA)                         | Sigma Aldrich                                  | #L8754       |
| RPMI                                             | Gibco                                          | # 11530586   |
